# Supplementary material for: Comparison of the Whole-Genome Sequence of the African Swine Fever Virus from a Mongolian Wild Boar with Genotype II Viruses from Asia and Europe
Source: MDPI journal article supplement (doi:10.3390/pathogens12091143), 2023-09-07
Supplement: s1 [file s1]

## Supplementary Material

**Figure S1:** Carcasses of Wild Boars Found in Tuv and Selenge Provinces.

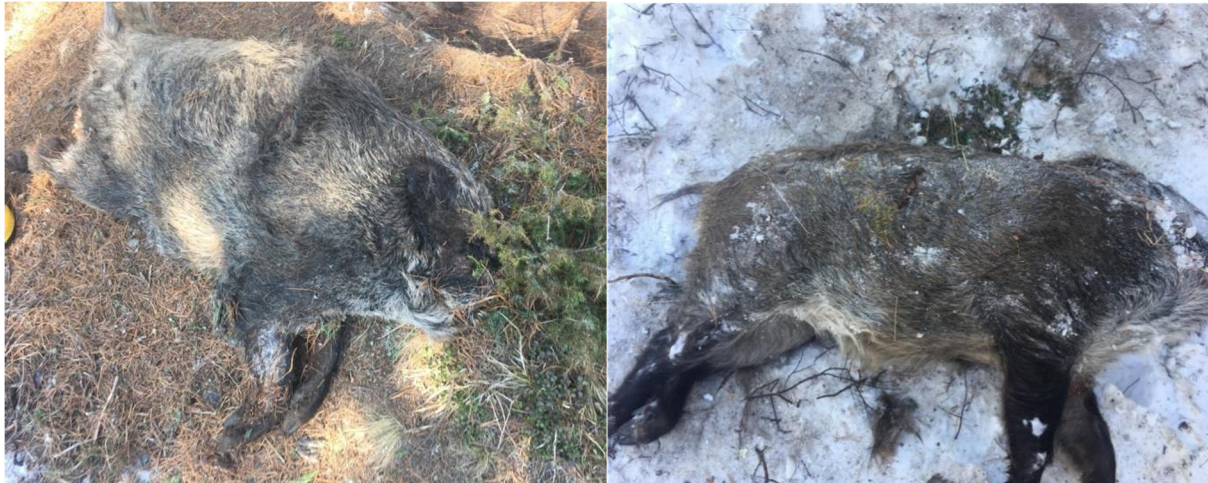

**Table S1:** PCR Analysis of p54 and p72 Gene Fragments using Extracted DNA from Six Types of Tissue Samples (Animals 2 and 3).

| №  | Location                                    |        | ASFV |     |          |
|----|---------------------------------------------|--------|------|-----|----------|
|    |                                             |        | P54  | P72 | Result   |
| 1  | Selenge province, Minjiin khangai           | Spleen | +    | +   | Positive |
| 2  | Tuv province, Mungunmorit soum, Eluur river | Kidney | +    | +   | Positive |
| 3  |                                             | Spleen | +    | +   | Positive |
| 4  |                                             | Hearth | +    | +   | Positive |
| 5  |                                             | Liver  | +    | +   | Positive |
| 6  |                                             | Lung   | +    | +   | Positive |
| C+ | Positive control                            |        | +    | +   | Positive |
| C- | Negative control                            |        | -    | -   | Negative |
